# Supplementary material for: Protective Potential of a Botanical-Based Supplement Ingredient against the Impact of Environmental Pollution on Cutaneous and Cardiopulmonary Systems: Preclinical Study
Source: MDPI journal article supplement (doi:10.3390/cimb46020099), 2024-02-15
Supplement: s1 [file s1]

# Protective Potential of a Botanical-Based Supplement Ingredient against the Impact of Environmental Pollution on Cutaneous and Cardiopulmonary Systems: Preclinical Study

Table S1: Table of Compounds Identified by HPLC-MS.

| Compounds Identified     | RT     | Mass     | Formula                                         | Tgt Mass | Diff (ppm) |
|--------------------------|--------|----------|-------------------------------------------------|----------|------------|
| Hydroxytyrosol           | 9.977  | 154.0626 | C <sub>8</sub> H <sub>10</sub> O <sub>3</sub>   | 154.063  | -2.76      |
| Chlorogenic acid         | 15.126 | 354.096  | C <sub>16</sub> H <sub>18</sub> O <sub>9</sub>  | 354.0951 | 2.52       |
| Caffeic acid             | 17.179 | 180.0426 | C <sub>9</sub> H <sub>8</sub> O <sub>4</sub>    | 180.0423 | 1.66       |
| Tyrosol                  | 17.307 | 138.0693 | C <sub>8</sub> H <sub>10</sub> O <sub>2</sub>   | 138.0681 | 9          |
| Verbascoside             | 23.338 | 624.2078 | C <sub>29</sub> H <sub>36</sub> O <sub>15</sub> | 624.2054 | 3.85       |
| Rutin                    | 24.14  | 610.1555 | C <sub>27</sub> H <sub>30</sub> O <sub>16</sub> | 610.1534 | 3.52       |
| Luteolin-7-O-glucoside   | 24.99  | 448.1019 | C <sub>21</sub> H <sub>20</sub> O <sub>11</sub> | 448.1006 | 3.04       |
| Apigenin-7-O-glucoside   | 25.984 | 432.1066 | C <sub>21</sub> H <sub>20</sub> O <sub>10</sub> | 432.1056 | 2.19       |
| Apigenin-7-O-glucuronide | 26.049 | 446.0884 | C <sub>21</sub> H <sub>18</sub> O <sub>11</sub> | 446.0849 | 7.82       |
| Rosmarinic acid          | 28.134 | 360.0856 | C <sub>18</sub> H <sub>16</sub> O <sub>8</sub>  | 360.0845 | 3.08       |
| Oleuropein               | 29.048 | 540.186  | C <sub>25</sub> H <sub>32</sub> O <sub>13</sub> | 540.1843 | 3.25       |
| Luteolin-7-O-glucuronide | 29.866 | 462.0817 | C <sub>21</sub> H <sub>18</sub> O <sub>12</sub> | 462.0798 | 4.08       |
| Quercetin                | 34.518 | 302.0439 | C <sub>15</sub> H <sub>10</sub> O <sub>7</sub>  | 302.0427 | 4.23       |
| Carnosol                 | 54.407 | 330.1843 | C <sub>20</sub> H <sub>26</sub> O <sub>4</sub>  | 330.1831 | 3.6        |
| Carnosic acid            | 57.615 | 332.1969 | C <sub>20</sub> H <sub>28</sub> O <sub>4</sub>  | 332.1988 | -5.5       |
| 12-Methyl carnosic acid  | 59.812 | 346.2152 | C <sub>21</sub> H <sub>30</sub> O <sub>4</sub>  | 346.2144 | 8          |

RT: retention Time; Mass: molecular weight; Tgt Mass: target mass; Diff (ppm): difference between the Mass detected and the target mass.

**HPLC-MS method used to identify active compounds in the four botanical blend:** HPLC/MS system consisted of HPLC Agilent 1200/TOF AGILENT 6220 Mass Spectrometer (Agilent Technologies Inc., Palo Alto, CA, USA) controlled by the Chemstation software. A Teknokroma Mediterranea sea RP-18, 5 µm, 250 x 0.46 cm column was used for analytical purposes. The mobile phases consisted in acetic acid 2.5% (A) and acetonitrile (B). The following multi-step linear gradient was applied: 0 min, 5% B; 22 min, 25% B; 45 min, 50% B; 55 min, 20% B; 66 min, 5% B; 70 min, 5% B. The flow rate was 0.8 mL/min, and the column temperature was 30°C. The injection volume in the HPLC system was 20 µL. The ESI source was operated in negative mode to generate [MH]<sup>-</sup> ions using the following conditions: desolvation temperature at 350°C and vaporizer temperature at 400°C; dry gas (nitrogen) and nebulizer were set at 12 L/min and 60 psi, respectively. VCap voltage was set at 3000 V, fragmentor at 180 V, skimmer at 65 V and Octopole RF peak at 250 V. The MS data were acquired as full scan mass spectra at 50–1200 m/z by using 50 ms for collection of the ions in the trap.

**Table S2. Composition of heavy metals and hydrocarbons solution**

Final concentrations applied on the explants of each compound of ICP multielement standard V Certi Pur ® solution (Merck ; reference 1.10714.0500 ; batch HC309202) supplemented with hydrocarbons and diesel particles:

| <b>Heavy metals</b>           |                                             |
|-------------------------------|---------------------------------------------|
| Al                            | 0.01 mg/mL                                  |
| AS                            | 0.01 mg/mL                                  |
| B                             | 0.001 mg/mL                                 |
| Ba                            | 0.001 mg/mL                                 |
| Be                            | 0.0005 mg/mL                                |
| Ca                            | 0.005 mg/mL                                 |
| Cd                            | 0.001 mg/mL                                 |
| Cr                            | 0.001 mg/mL                                 |
| Cu                            | 0.001 mg/mL                                 |
| Fe                            | 0.001 mg/mL                                 |
| Hg                            | 0.0025 mg/mL                                |
| K                             | 0.0495 mg/mL                                |
| Li                            | 0.001 mg/mL                                 |
| Mg                            | 0.0005 mg/mL                                |
| Mn                            | 0.0005 mg/mL                                |
| Na                            | 0.01 mg/mL                                  |
| Ni                            | 0.0025 mg/mL                                |
| P                             | 0.005 mg/mLg                                |
| Pb                            | 0.01 mg/mL                                  |
| Sc                            | 0.0005mg/mL                                 |
| Sa                            | 0.01 mg/mL                                  |
| Sr                            | 0.000 5mg/mL                                |
| Te                            | 0.01 mg/mL                                  |
| Ti                            | 0.001 mg/mL                                 |
| Y                             | 0.0005 mg/mL                                |
| Zn                            | 0.001 mg/mL                                 |
| <b>Hydrocarbons</b>           |                                             |
| Benzene                       | 1µL/ml                                      |
| Xylene                        | 1µL/mL                                      |
| Toluene                       | 1 µl/ml                                     |
| <b>Diesel particles (DP):</b> | 0.1 mg/mL in the pollutant mixture solution |

**Table S3: Compositional analysis from Urban Dust (heavy metals)**

\* Analytic report using Atomic Spectrometry

| Element | Units | Urban Dust | Element | Units | Urban Dust |
|---------|-------|------------|---------|-------|------------|
| Ca      | mg/kg | 131.458,50 | Gd      | mg/kg | 5,55       |
| Al      | mg/kg | 16.072,00  | Co      | mg/kg | 4,74       |
| Mg      | mg/kg | 15.374,50  | I       | mg/kg | 4,73       |
| Fe      | mg/kg | 14.995,00  | Pr      | mg/kg | 3,94       |
| Si      | mg/kg | 9.350,50   | Nb      | mg/kg | 3,71       |
| K       | mg/kg | 7.186,00   | Bi      | mg/kg | 2,39       |
| Na      | mg/kg | 6.161,00   | Cs      | mg/kg | 2,13       |
| P       | mg/kg | 2.332,50   | Sm      | mg/kg | 2,07       |
| Zn      | mg/kg | 2.063,00   | Dy      | mg/kg | 1,81       |
| Ti      | mg/kg | 973,50     | Ag      | µg/Kg | 1.519,00   |
| Ba      | mg/kg | 666,00     | Yb      | µg/Kg | 1.370,50   |
| Cu      | mg/kg | 339,50     | Hf      | µg/Kg | 1.066,50   |
| Mn      | mg/kg | 256,00     | Er      | µg/Kg | 958,50     |
| Sr      | mg/kg | 241,50     | U       | µg/Kg | 877,50     |
| Ce      | mg/kg | 194,70     | Eu      | µg/Kg | 765,50     |
| Pb      | mg/Kg | 130,80     | Tl      | µg/Kg | 598,00     |
| Cr      | mg/kg | 81,95      | Hg      | µg/Kg | 460,50     |
| Sn      | mg/kg | 64,40      | Ho      | µg/Kg | 417,00     |
| V       | mg/kg | 43,65      | Au      | µg/Kg | 363,50     |
| Br      | mg/kg | 42,05      | In      | µg/Kg | 229,50     |
| Ni      | mg/kg | 41,15      | Tb      | µg/Kg | 205,00     |
| Rb      | mg/kg | 28,80      | Tm      | µg/Kg | 147,50     |
| Sb      | mg/kg | 26,20      | Pd      | µg/Kg | 147,00     |
| Zr      | mg/kg | 26,00      | Cd      | µg/Kg | 137,50     |
| La      | mg/kg | 19,10      | Ta      | µg/Kg | 89,50      |
| Nd      | mg/kg | 17,55      | Lu      | µg/Kg | 87,50      |
| B       | mg/kg | 16,90      | Pt      | µg/Kg | 79,50      |
| As      | mg/kg | 14,88      |         |       |            |
| Mo      | mg/kg | 14,15      |         |       |            |
| W       | mg/kg | 10,71      |         |       |            |
| Y       | mg/kg | 10,69      |         |       |            |
| Th      | mg/kg | 5,96       |         |       |            |

**Figure S1: Flow Chart ZP**

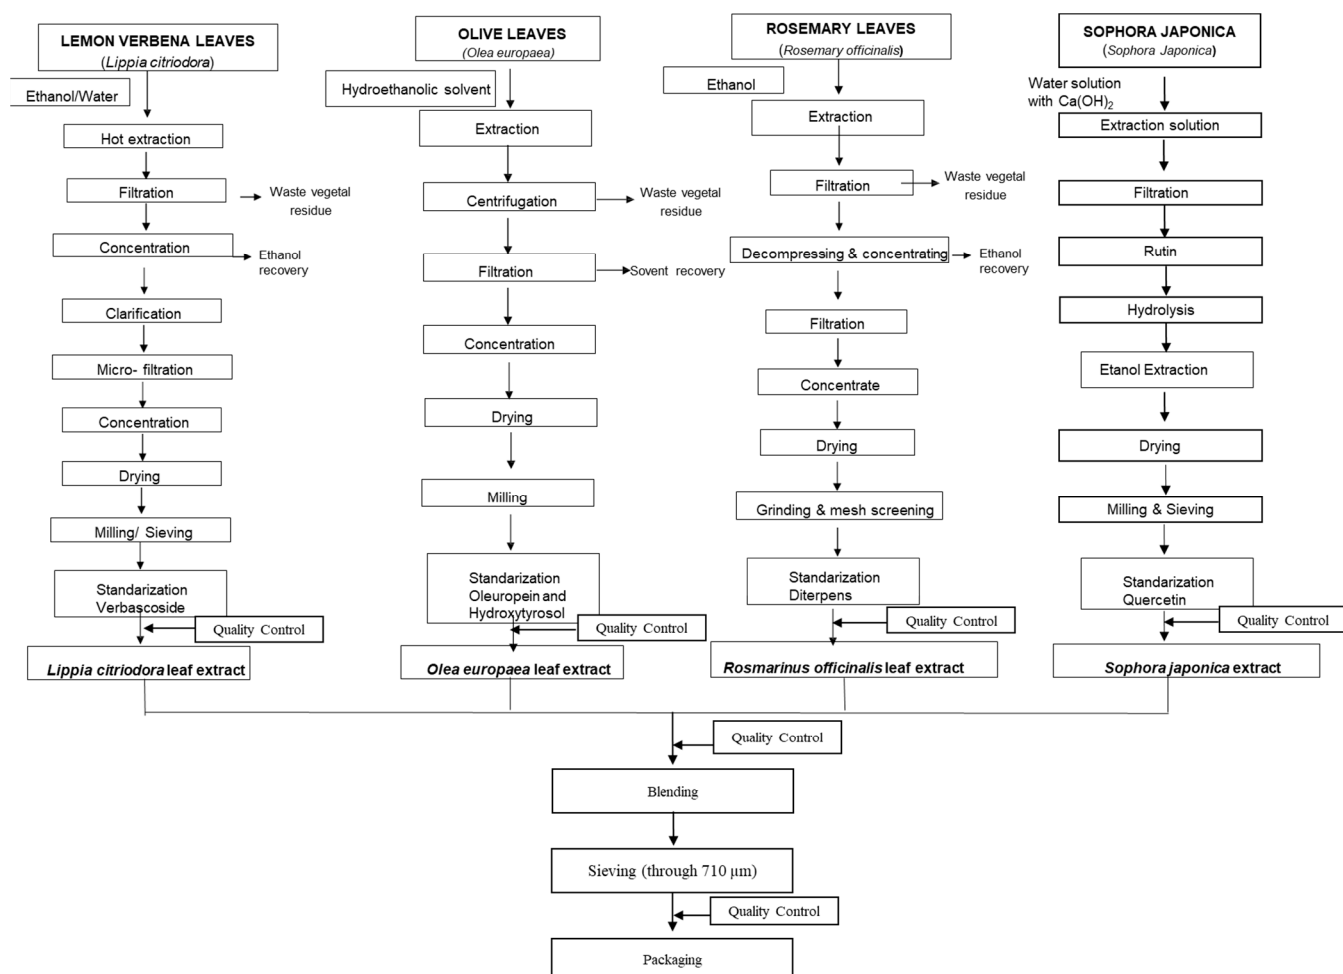

**Figure S2: Representative high-performance liquid chromatography (HPLC) chromatogram of the compounds identified in the blend.**

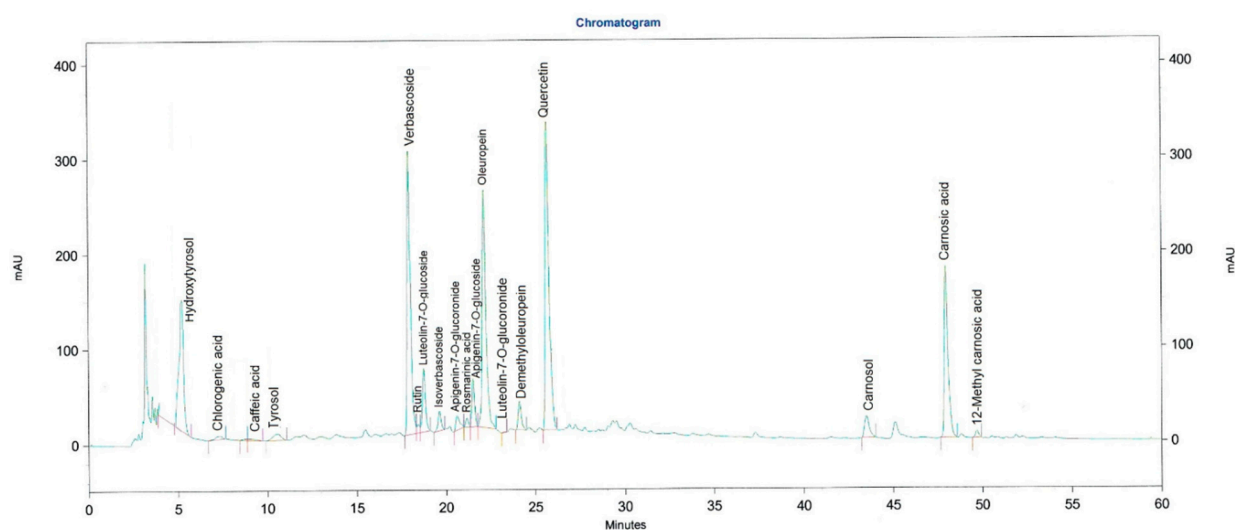

**Method used to identify and quantify main active compounds by HPLC:** The composition of the combination of extracts was identified and quantified by using an HPLC with Array Photodiode (HPLC-DAD), VWR Hitachi Elite, comparing the retention time and UV spectra of the peaks in the samples with those of authentic standards or data

reported in the literature. A BDS Hypersil C18 (5 $\mu$ m, 250 $\times$ 4 mm) column was used for analytical purposes. The separation of the compounds was carried out at 30°C with a gradient elution program at a flow rate of 1 ml min<sup>-1</sup>. The mobile phases consisted in acetic acid 2.5% (A) and acetonitrile (B). The following multi-step linear gradient was applied: 0 min, 5% B; 20 min, 25% B; 40 min, 50% B; 50 min, 20% B; 60 min, 5% B. The injection volume in the HPLC system was 20  $\mu$ l. The UV-vis detection was performed in the 190–450 nm range. Different wavelengths were set to quantify the main active compounds: 280nm for Hydroxytyrosol and Oleuropein, 330nm for verbascoside, 370nm for quercetin and 230 nm for carnosic acid, carnosol y 12-methyl carnosic acid (diterpens). Each main active was identified by comparison of the UV-Vis spectrum and retention time with the correspondence of the Reference Standard (RS) and its content (dry basis) measured by area comparison of the sample peak versus standard peak.
