# Supplementary material for: Protective Potential of a Botanical-Based Supplement Ingredient against the Impact of Environmental Pollution on Cutaneous and Cardiopulmonary Systems: Preclinical Study
Source: Curr Issues Mol Biol. 2024 Feb 15;46(2):1530–55. doi: 10.3390/cimb46020099 (PMC10887869; doi:10.3390/cimb46020099)
Supplement: Supplementary file 1 [file cimb-46-00099-s001.zip]

Archive with 4 entries (4 files):
- cimb-2855645-supplementary.pdf
- Video S1 - Medaka Control negative.mp4
- Video S2 - Medaka Control UD 250 ug ml.mp4
- Video S3 - Medaka ZP 0.01 -UD.mp4
